# Supplementary material
Source: publisher site journal article supplement (https://www.spandidos-publications.com/7918/downloadSupplementary)
Supplement: Supplementary file 1 [file downloadSupplementary]

**Table SI.** Clinical variables of the whole cohort grouped by pathological differentiation.

| Variable                | Overall (n=224)           | Well differentiated (n=46) | Non-well differentiated (n=178) | P-value <sup>a</sup> |
|-------------------------|---------------------------|----------------------------|---------------------------------|----------------------|
| Age, years              | 60.000 (54.000-69.000)    | 57.000 (48.500-69.500)     | 60.000 (55.000-69.000)          | 0.170                |
| CEA, ng/ml              | 2.505 (1.408-8.123)       | 1.990 (1.135-5.500)        | 2.565 (1.505-8.368)             | 0.112                |
| CA 19-9, U/ml           | 13.645 (7.890-28.638)     | 10.155 (6.698-17.348)      | 14.520 (8.318-31.003)           | 0.014                |
| AST, U/l                | 20.900 (17.000-26.025)    | 25.100 (17.175-32.150)     | 20.265 (17.000-25.450)          | 0.017                |
| PA, mg/l                | 205.050 (168.850-247.125) | 203.400 (162.483-251.200)  | 205.050 (171.625-246.900)       | 0.802                |
| A/G                     | 1.455 (1.310-1.623)       | 1.495 (1.313-1.653)        | 1.450 (1.310-1.618)             | 0.541                |
| TBIL, $\mu$ mol/l       | 11.400 (8.600-14.700)     | 11.800 (8.880-13.300)      | 11.360 (8.300-15.000)           | 0.921                |
| DBIL, $\mu$ mol/l       | 3.600 (2.700-4.909)       | 3.625 (2.850-4.575)        | 3.600 (2.663-4.926)             | 0.989                |
| ALT, U/l                | 16.050 (11.793-23.000)    | 21.000 (13.025-37.875)     | 15.250 (11.000-20.975)          | 0.001                |
| LAC, mmol/l             | 2.225 (1.735-2.870)       | 2.055 (1.703-2.588)        | 2.310 (1.753-2.923)             | 0.088                |
| Cr, $\mu$ mol/l         | 68.050 (57.150-78.000)    | 69.250 (56.300-75.075)     | 67.950 (57.525-78.000)          | 0.945                |
| ALP, U/l                | 81.200 (68.375-100.000)   | 81.300 (69.250-99.000)     | 81.200 (68.125-100.000)         | 0.640                |
| GGT, U/l                | 19.000 (13.300-33.000)    | 22.350 (14.850-30.075)     | 19.000 (13.000-33.000)          | 0.246                |
| ADA, U/l                | 10.600 (8.190-13.188)     | 10.500 (8.025-12.685)      | 10.650 (8.300-13.375)           | 0.421                |
| LAP, U/l                | 31.400 (27.975-36.325)    | 32.250 (28.075-38.875)     | 31.400 (27.775-35.475)          | 0.362                |
| WBC, $\times 10^9/l$    | 6.270 (5.260-7.458)       | 6.130 (5.093-7.043)        | 6.320 (5.303-7.740)             | 0.220                |
| RBC, $\times 10^{12}/l$ | 4.340 (3.918-4.723)       | 4.440 (3.870-4.680)        | 4.300 (3.935-4.760)             | 0.997                |
| ALB, g/l                | 41.750 (38.800-45.000)    | 42.050 (38.575-44.300)     | 41.650 (38.850-45.075)          | 0.802                |
| Hb, g/l                 | 128.500 (112.750-143.000) | 134.000 (113.000-145.500)  | 127.000 (112.250-142.000)       | 0.400                |
| PLT, $\times 10^9/l$    | 202.000 (160.500-250.500) | 196.500 (168.250-235.500)  | 205.000 (159.000-257.750)       | 0.673                |
| Neu, $\times 10^9/l$    | 4.200 (3.175-5.095)       | 3.980 (3.010-4.923)        | 4.270 (3.233-5.353)             | 0.237                |
| Lym, $\times 10^9/l$    | 1.450 (1.030-1.883)       | 1.585 (1.113-1.818)        | 1.410 (1.030-1.928)             | 0.485                |
| Mono, $\times 10^9/l$   | 0.380 (0.300-0.480)       | 0.360 (0.300-0.438)        | 0.385 (0.300-0.508)             | 0.338                |
| HALP score              | 38.352 (23.608-53.684)    | 42.607 (25.597-53.052)     | 37.962 (23.232-54.021)          | 0.602                |
| Sex                     |                           |                            |                                 | 0.733                |
| Female                  | 78 (34.8)                 | 17 (37.0)                  | 61 (34.3)                       |                      |
| Male                    | 146 (65.2)                | 29 (63.0)                  | 117 (65.7)                      |                      |
| Grade                   |                           |                            |                                 | 0.312                |
| IIIA                    | 120 (53.6)                | 25 (54.3)                  | 95 (53.4)                       |                      |

|                             |            |           |            |       |
|-----------------------------|------------|-----------|------------|-------|
| IIIB                        | 87 (38.8)  | 20 (43.5) | 67 (37.6)  |       |
| IVA                         | 17 (7.6)   | 1 (2.2)   | 16 (9.0)   |       |
| T stage                     |            |           |            | 0.060 |
| T2                          | 16 (7.1)   | 7 (15.2)  | 9 (5.1)    |       |
| T3                          | 124 (55.4) | 22 (47.8) | 102 (57.3) |       |
| T4                          | 84 (37.5)  | 17 (37.0) | 67 (37.6)  |       |
| N stage                     |            |           |            | 0.234 |
| N0                          | 18 (8.0)   | 2 (4.3)   | 16 (9.0)   |       |
| N1                          | 78 (34.8)  | 21 (45.7) | 57 (32.0)  |       |
| N2                          | 125 (55.8) | 22 (47.8) | 103 (57.9) |       |
| N3                          | 3 (1.3)    | 1 (2.2)   | 2 (1.1)    |       |
| M stage                     |            |           |            | 0.134 |
| M0                          | 205 (91.5) | 45 (97.8) | 160 (89.9) |       |
| M1                          | 19 (8.5)   | 1 (2.2)   | 18 (10.1)  |       |
| CRM                         |            |           |            | 0.527 |
| (-)                         | 87 (38.8)  | 16 (34.8) | 71 (39.9)  |       |
| (+)                         | 137 (61.2) | 30 (65.2) | 107 (60.1) |       |
| EMVI                        |            |           |            | 0.567 |
| (-)                         | 56 (25.0)  | 13 (28.3) | 43 (24.2)  |       |
| (+)                         | 168 (75.0) | 33 (71.7) | 135 (75.8) |       |
| Distance from anus<br>verge |            |           |            | 0.580 |
| <5 cm                       | 86 (38.4)  | 16 (34.8) | 70 (39.3)  |       |
| 5-10 cm                     | 109 (48.7) | 22 (47.8) | 87 (48.9)  |       |
| >10 cm                      | 29 (12.9)  | 8 (17.4)  | 21 (11.8)  |       |
| Tumor length                |            |           |            | 0.247 |
| <2 cm                       | 14 (6.3)   | 5 (10.9)  | 9 (5.1)    |       |
| 2-5 cm                      | 143 (63.8) | 30 (65.2) | 113 (63.5) |       |
| >5 cm                       | 67 (29.9)  | 11 (23.9) | 56 (31.5)  |       |

Data are presented as the median (interquartile range or n (%)). <sup>a</sup>Determined using the Wilcoxon rank sum test, Pearson's  $\chi^2$  or Fisher's exact test. CEA, carcinoembryonic antigen; CA 19-9, carbohydrate antigen 19-9; AST, aspartate aminotransferase; PA, prealbumin; A/G, albumin-to-globulin ratio; TBIL, total bilirubin; DBIL, direct bilirubin; ALT, alanine transaminase; LAC, lactate; Cr, creatinine; ALP, alkaline phosphatase; GGT,  $\gamma$ -glutamyl transferase; ADA, adenosine deaminase; LAP, leucine aminopeptidase; WBC, white blood cell; RBC, red blood cell; ALB, albumin; Hb, hemoglobin; PLT, platelet; Neu, neutrophil; Lym, lymphocyte; Mono, monocyte; HALP, Hb, ALB Lym, platelet; T, tumor; N, node; M, metastasis; CRM, circumferential resection margin; EMVI, extramural vascular invasion.
